# Supplementary material
Source: Springer Nature journal article supplement (https://www.springermedizin.de/resource/supplementary/13550_2012_100_MOESM3_ESM.pdf/9687630)

hypometabolic artefacts number

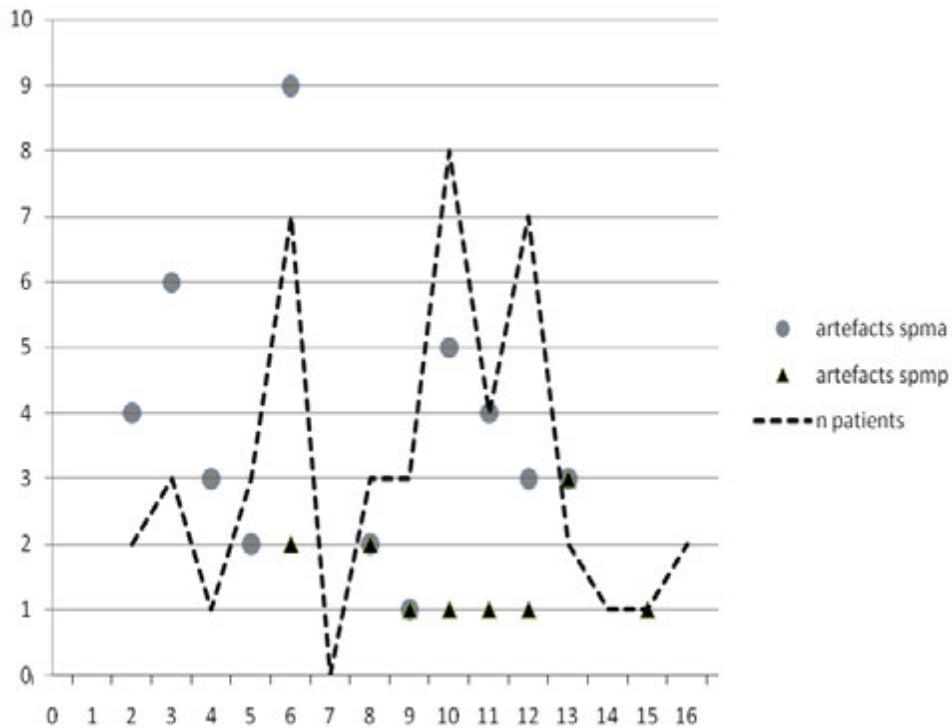

Supplement: MOESM3 [file 9687630]
